# Supplementary material
Source: Springer Nature journal article supplement (https://www.springermedizin.de/resource/supplementary/12874_2010_537_MOESM4_ESM.pdf/9432418)

## Analysis 01.01. Comparison 01 Multicomponent fortification vs control (all trials), Outcome 01 Weight gain (g/kg/day)

Review: Multicomponent fortified human milk for promoting growth in preterm infants

Comparison: 01 Multicomponent fortification vs control (all trials)

Outcome: 01 Weight gain (g/kg/day)

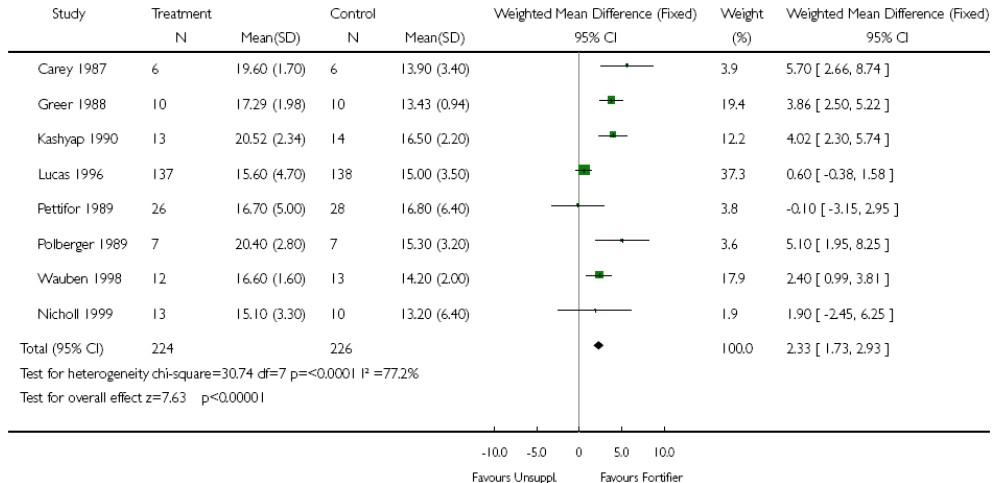

Supplement: MOESM4 [file 9432418]
